# Supplementary material for: Characteristics of genomic alterations of lung adenocarcinoma in young never‐smokers
Source: PubMed Central journal article supplement — Int J Cancer. 2018 May 7;143(7):1696–705. doi: 10.1002/ijc.31542 (PMC6175072; doi:10.1002/ijc.31542), 2018-05-07
Supplement: IJC-143-1696-s006.pdf [file IJC-143-1696-s006.pdf]

**Supplementary Table 6. Mutation frequency of 50 LUAD related genes in our cohort and the TCGA cohort**

| <b>Gene</b> | <b>Young Never-smokers(n=36)<br/># silent mutations</b> | <b>Young Never-smokers(n=36)<br/># missense mutations</b> | <b>Young Never-smokers(n=36)<br/># nonsense mutations</b> | <b>Young Never-smokers(n=36)<br/># splice site mutations</b> | <b>Young Never-smokers(n=36)<br/># indels</b> |
|-------------|---------------------------------------------------------|-----------------------------------------------------------|-----------------------------------------------------------|--------------------------------------------------------------|-----------------------------------------------|
| TP53        | 0                                                       | 6                                                         | 3                                                         | 0                                                            | 2                                             |
| EGFR        | 0                                                       | 7                                                         | 0                                                         | 0                                                            | 3                                             |
| KRAS        | 0                                                       | 4                                                         | 0                                                         | 0                                                            | 0                                             |
| RB1         | 0                                                       | 0                                                         | 2                                                         | 1                                                            | 0                                             |
| NF1         | 0                                                       | 1                                                         | 0                                                         | 1                                                            | 0                                             |
| CDKN2A      | 0                                                       | 2                                                         | 0                                                         | 0                                                            | 0                                             |
| SETD2       | 0                                                       | 2                                                         | 1                                                         | 0                                                            | 1                                             |
| PTEN        | 0                                                       | 0                                                         | 0                                                         | 1                                                            | 1                                             |
| U2AF1       | 0                                                       | 1                                                         | 0                                                         | 0                                                            | 0                                             |
| MGA         | 0                                                       | 1                                                         | 0                                                         | 0                                                            | 0                                             |
| ERBB2       | 0                                                       | 0                                                         | 0                                                         | 0                                                            | 1                                             |
| RUFY2       | 0                                                       | 1                                                         | 0                                                         | 0                                                            | 0                                             |
| SKIV2L2     | 0                                                       | 1                                                         | 0                                                         | 0                                                            | 0                                             |
| TBC1D14     | 0                                                       | 1                                                         | 0                                                         | 0                                                            | 0                                             |
| APC         | 0                                                       | 0                                                         | 0                                                         | 1                                                            | 0                                             |
| STK11       | 0                                                       | 0                                                         | 0                                                         | 0                                                            | 0                                             |
| PIK3CA      | 0                                                       | 0                                                         | 0                                                         | 0                                                            | 0                                             |
| ATM         | 0                                                       | 0                                                         | 0                                                         | 0                                                            | 0                                             |
| MLEC        | 0                                                       | 0                                                         | 0                                                         | 0                                                            | 0                                             |
| NCKAP1L     | 1                                                       | 0                                                         | 0                                                         | 0                                                            | 0                                             |
| CRISPLD1    | 0                                                       | 0                                                         | 0                                                         | 0                                                            | 0                                             |
| NSUN3       | 0                                                       | 0                                                         | 0                                                         | 0                                                            | 0                                             |
| RBM10       | 0                                                       | 0                                                         | 0                                                         | 0                                                            | 0                                             |
| KEAP1       | 0                                                       | 0                                                         | 0                                                         | 0                                                            | 0                                             |
| BRAF        | 0                                                       | 0                                                         | 0                                                         | 0                                                            | 0                                             |
| SMARCA4     | 0                                                       | 0                                                         | 0                                                         | 0                                                            | 0                                             |
| MET         | 0                                                       | 0                                                         | 0                                                         | 0                                                            | 0                                             |
| ARID1A      | 0                                                       | 0                                                         | 0                                                         | 0                                                            | 0                                             |
| RIT1        | 0                                                       | 0                                                         | 0                                                         | 0                                                            | 0                                             |
| HAX1        | 0                                                       | 0                                                         | 0                                                         | 0                                                            | 0                                             |
| CDC27       | 0                                                       | 0                                                         | 0                                                         | 0                                                            | 0                                             |
| CLIP1       | 0                                                       | 0                                                         | 0                                                         | 0                                                            | 0                                             |
| ATF7IP      | 0                                                       | 0                                                         | 0                                                         | 0                                                            | 0                                             |
| C7orf45     | 0                                                       | 0                                                         | 0                                                         | 0                                                            | 0                                             |
| KIAA0907    | 0                                                       | 0                                                         | 0                                                         | 0                                                            | 0                                             |
| CSF3R       | 0                                                       | 0                                                         | 0                                                         | 0                                                            | 0                                             |
| ZNF223      | 0                                                       | 0                                                         | 0                                                         | 0                                                            | 0                                             |

|        |   |   |   |   |   |   |
|--------|---|---|---|---|---|---|
| RPL5   | 0 | 0 | 0 | 0 | 0 | 0 |
| IL32   | 0 | 0 | 0 | 0 | 0 | 0 |
| KLF5   | 0 | 0 | 0 | 0 | 0 | 0 |
| PAPD7  | 0 | 0 | 0 | 0 | 0 | 0 |
| DBR1   | 0 | 0 | 0 | 0 | 0 | 0 |
| DOT1L  | 0 | 0 | 0 | 0 | 0 | 0 |
| SAPS1  | 0 | 0 | 0 | 0 | 0 | 0 |
| MAP1B  | 0 | 0 | 0 | 0 | 0 | 0 |
| SNX9   | 0 | 0 | 0 | 0 | 0 | 0 |
| CD40LG | 0 | 0 | 0 | 0 | 0 | 0 |
| SFRS18 | 0 | 0 | 0 | 0 | 0 | 0 |
| UBAP2  | 0 | 0 | 0 | 0 | 0 | 0 |
| COL9A2 | 0 | 0 | 0 | 0 | 0 | 0 |

| Young Never-smokers(n=36)<br># mutated patients | Young Never-smokers(n=36)<br># mutated sites | Nature Samples (n=412)<br># silent mutations | Nature Samples (n=412)<br># missense mutations | Nature Samples (n=412)<br># nonsense mutations | Nature Samples (n=412)<br># splice site mutations |
|-------------------------------------------------|----------------------------------------------|----------------------------------------------|------------------------------------------------|------------------------------------------------|---------------------------------------------------|
| 10                                              | 11                                           | 6                                            | 132                                            | 42                                             | 10                                                |
| 9                                               | 5                                            | 3                                            | 56                                             | 1                                              | 0                                                 |
| 4                                               | 2                                            | 1                                            | 115                                            | 1                                              | 0                                                 |
| 3                                               | 3                                            | 0                                            | 4                                              | 1                                              | 3                                                 |
| 2                                               | 2                                            | 11                                           | 21                                             | 11                                             | 6                                                 |
| 2                                               | 2                                            | 1                                            | 6                                              | 4                                              | 2                                                 |
| 2                                               | 4                                            | 2                                            | 13                                             | 10                                             | 3                                                 |
| 2                                               | 2                                            | 1                                            | 2                                              | 3                                              | 1                                                 |
| 1                                               | 1                                            | 1                                            | 13                                             | 0                                              | 0                                                 |
| 1                                               | 1                                            | 4                                            | 11                                             | 11                                             | 1                                                 |
| 1                                               | 1                                            | 2                                            | 2                                              | 1                                              | 1                                                 |
| 1                                               | 1                                            | 0                                            | 7                                              | 1                                              | 1                                                 |
| 1                                               | 1                                            | 1                                            | 13                                             | 1                                              | 1                                                 |
| 1                                               | 1                                            | 0                                            | 2                                              | 3                                              | 0                                                 |
| 1                                               | 1                                            | 1                                            | 11                                             | 1                                              | 3                                                 |
| 0                                               | 0                                            | 1                                            | 18                                             | 19                                             | 9                                                 |
| 0                                               | 0                                            | 3                                            | 23                                             | 0                                              | 0                                                 |
| 0                                               | 0                                            | 4                                            | 26                                             | 13                                             | 3                                                 |
| 0                                               | 0                                            | 0                                            | 2                                              | 0                                              | 0                                                 |
| 0                                               | 0                                            | 3                                            | 20                                             | 2                                              | 0                                                 |
| 0                                               | 0                                            | 2                                            | 14                                             | 2                                              | 1                                                 |
| 0                                               | 0                                            | 0                                            | 3                                              | 0                                              | 3                                                 |
| 0                                               | 0                                            | 1                                            | 8                                              | 8                                              | 5                                                 |
| 0                                               | 0                                            | 0                                            | 49                                             | 3                                              | 2                                                 |
| 0                                               | 0                                            | 0                                            | 34                                             | 1                                              | 3                                                 |
| 0                                               | 0                                            | 3                                            | 18                                             | 12                                             | 2                                                 |
| 0                                               | 0                                            | 3                                            | 16                                             | 1                                              | 4                                                 |
| 0                                               | 0                                            | 4                                            | 17                                             | 15                                             | 0                                                 |
| 0                                               | 0                                            | 1                                            | 8                                              | 0                                              | 0                                                 |
| 0                                               | 0                                            | 1                                            | 1                                              | 0                                              | 0                                                 |
| 0                                               | 0                                            | 1                                            | 8                                              | 1                                              | 0                                                 |
| 0                                               | 0                                            | 3                                            | 6                                              | 0                                              | 0                                                 |
| 0                                               | 0                                            | 1                                            | 9                                              | 3                                              | 3                                                 |
| 0                                               | 0                                            | 1                                            | 7                                              | 1                                              | 0                                                 |
| 0                                               | 0                                            | 0                                            | 5                                              | 0                                              | 0                                                 |
| 0                                               | 0                                            | 0                                            | 4                                              | 0                                              | 2                                                 |
| 0                                               | 0                                            | 2                                            | 8                                              | 1                                              | 0                                                 |

|   |   |   |    |   |   |
|---|---|---|----|---|---|
| 0 | 0 | 0 | 1  | 1 | 2 |
| 0 | 0 | 1 | 2  | 0 | 0 |
| 0 | 0 | 1 | 10 | 0 | 0 |
| 0 | 0 | 2 | 7  | 0 | 0 |
| 0 | 0 | 0 | 1  | 0 | 0 |
| 0 | 0 | 1 | 4  | 5 | 1 |
| 0 | 0 | 0 | 6  | 3 | 2 |
| 0 | 0 | 6 | 9  | 0 | 0 |
| 0 | 0 | 0 | 7  | 3 | 0 |
| 0 | 0 | 1 | 8  | 1 | 1 |
| 0 | 0 | 0 | 5  | 2 | 0 |
| 0 | 0 | 1 | 8  | 0 | 0 |
| 0 | 0 | 0 | 4  | 1 | 1 |

| Nature Samples<br>(n=412)<br># indels | Nature Samples<br>(n=412)<br># mutated<br>patients | Nature Samples<br>(n=412)<br># mutated sites | Young Never-<br>smokers<br>percentage | Nature<br>Percentage | P Value |
|---------------------------------------|----------------------------------------------------|----------------------------------------------|---------------------------------------|----------------------|---------|
| 26                                    | 196                                                | 139                                          | 27.78%                                | 47.57%               | 0.024   |
| 24                                    | 64                                                 | 40                                           | 25.00%                                | 15.53%               | 0.157   |
| 0                                     | 115                                                | 9                                            | 11.11%                                | 27.91%               | 0.030   |
| 8                                     | 16                                                 | 16                                           | 8.33%                                 | 3.88%                | 0.189   |
| 14                                    | 45                                                 | 52                                           | 5.56%                                 | 10.92%               | 0.407   |
| 6                                     | 18                                                 | 16                                           | 5.56%                                 | 4.37%                | 0.670   |
| 11                                    | 29                                                 | 37                                           | 5.56%                                 | 7.04%                | 1.000   |
| 1                                     | 7                                                  | 7                                            | 5.56%                                 | 1.70%                | 0.158   |
| 0                                     | 13                                                 | 2                                            | 2.78%                                 | 3.16%                | 1.000   |
| 6                                     | 25                                                 | 29                                           | 2.78%                                 | 6.07%                | 0.711   |
| 6                                     | 10                                                 | 7                                            | 2.78%                                 | 2.43%                | 0.606   |
| 1                                     | 10                                                 | 9                                            | 2.78%                                 | 2.43%                | 0.606   |
| 1                                     | 16                                                 | 15                                           | 2.78%                                 | 3.88%                | 1.000   |
| 1                                     | 6                                                  | 5                                            | 2.78%                                 | 1.46%                | 0.446   |
| 4                                     | 19                                                 | 19                                           | 2.78%                                 | 4.61%                | 1.000   |
| 20                                    | 64                                                 | 53                                           | 0.00%                                 | 15.53%               | 0.005   |
| 0                                     | 23                                                 | 13                                           | 0.00%                                 | 5.58%                | 0.241   |
| 5                                     | 41                                                 | 45                                           | 0.00%                                 | 9.95%                | 0.063   |
| 3                                     | 5                                                  | 3                                            | 0.00%                                 | 1.21%                | 1.000   |
| 1                                     | 21                                                 | 23                                           | 0.00%                                 | 5.10%                | 0.398   |
| 1                                     | 18                                                 | 17                                           | 0.00%                                 | 4.37%                | 0.383   |
| 0                                     | 6                                                  | 5                                            | 0.00%                                 | 1.46%                | 1.000   |
| 9                                     | 30                                                 | 29                                           | 0.00%                                 | 7.28%                | 0.156   |
| 7                                     | 61                                                 | 58                                           | 0.00%                                 | 14.81%               | 0.009   |
| 0                                     | 36                                                 | 22                                           | 0.00%                                 | 8.74%                | 0.100   |
| 3                                     | 33                                                 | 34                                           | 0.00%                                 | 8.01%                | 0.096   |
| 3                                     | 24                                                 | 22                                           | 0.00%                                 | 5.83%                | 0.243   |
| 3                                     | 31                                                 | 34                                           | 0.00%                                 | 7.52%                | 0.159   |
| 2                                     | 10                                                 | 8                                            | 0.00%                                 | 2.43%                | 1.000   |
| 5                                     | 6                                                  | 3                                            | 0.00%                                 | 1.46%                | 1.000   |
| 4                                     | 13                                                 | 10                                           | 0.00%                                 | 3.16%                | 0.612   |
| 1                                     | 7                                                  | 3                                            | 0.00%                                 | 1.70%                | 1.000   |
| 4                                     | 18                                                 | 19                                           | 0.00%                                 | 4.37%                | 0.383   |
| 2                                     | 10                                                 | 10                                           | 0.00%                                 | 2.43%                | 1.000   |
| 4                                     | 9                                                  | 6                                            | 0.00%                                 | 2.18%                | 1.000   |
| 2                                     | 8                                                  | 7                                            | 0.00%                                 | 1.94%                | 1.000   |
| 0                                     | 9                                                  | 6                                            | 0.00%                                 | 2.18%                | 1.000   |

|   |    |    |       |       |       |
|---|----|----|-------|-------|-------|
| 4 | 8  | 8  | 0.00% | 1.94% | 1.000 |
| 4 | 6  | 3  | 0.00% | 1.46% | 1.000 |
| 0 | 10 | 7  | 0.00% | 2.43% | 1.000 |
| 3 | 10 | 8  | 0.00% | 2.43% | 1.000 |
| 4 | 5  | 3  | 0.00% | 1.21% | 1.000 |
| 3 | 12 | 13 | 0.00% | 2.91% | 0.611 |
| 1 | 12 | 12 | 0.00% | 2.91% | 0.611 |
| 3 | 12 | 11 | 0.00% | 2.91% | 0.611 |
| 0 | 10 | 10 | 0.00% | 2.43% | 1.000 |
| 0 | 10 | 10 | 0.00% | 2.43% | 1.000 |
| 2 | 9  | 7  | 0.00% | 2.18% | 1.000 |
| 2 | 9  | 8  | 0.00% | 2.18% | 1.000 |
| 1 | 7  | 7  | 0.00% | 1.70% | 1.000 |
