# Supplementary material for: Characteristics of genomic alterations of lung adenocarcinoma in young never‐smokers
Source: PubMed Central journal article supplement — Int J Cancer. 2018 May 7;143(7):1696–705. doi: 10.1002/ijc.31542 (PMC6175072; doi:10.1002/ijc.31542), 2018-05-07
Supplement: IJC-143-1696-s009.pdf [file IJC-143-1696-s009.pdf]

**Supplementary Table 9. Germline variants annotated by ACMG**

|                  | <b>sample</b>   | <b>P/LP</b> | <b>Priority</b> | <b>CHROM</b> | <b>POS</b> |
|------------------|-----------------|-------------|-----------------|--------------|------------|
|                  | F_2304860Y4     | P           | H               | 11           | 67163628   |
|                  | F_510575Y31     | P           | H               | 11           | 67163628   |
|                  | F_15508763Y13   | P           | H               | 5            | 42719092   |
|                  | F_3484996Y34    | P           | H               | 5            | 42719092   |
|                  | F_8117392Y20    | P           | H               | 5            | 42719092   |
|                  | F_900419Y7      | P           | H               | 5            | 42719092   |
|                  | F_16292193Y17   | LP          | H               | 17           | 37871613   |
|                  | F_15508763Y13   | P           | H               | 20           | 31889141   |
|                  | F_1951831Y15    | P           | H               | 20           | 31889141   |
|                  | F_510575Y31     | P           | H               | 20           | 31889141   |
|                  | F_8412667Y10    | P           | H               | 20           | 31889141   |
|                  | F_10166792Y6    | P           | M               | 13           | 108861645  |
|                  | F_900419Y7      | P           | M               | 13           | 108861645  |
|                  | F_1984806Y25    | P           | H               | 17           | 7574017    |
|                  | F_0017184894Y35 | P           | M               | 12           | 6711144    |
|                  | F_15703811Y21   | P           | M               | 12           | 6711144    |
|                  | F_15833122Y14   | P           | M               | 12           | 6711144    |
|                  | F_1951831Y15    | P           | M               | 12           | 6711144    |
|                  | F_1984806Y25    | P           | H               | 14           | 81606063   |
|                  | F_7100021Y24    | P           | H               | 14           | 81609976   |
|                  | F_16233093Y3    | P           | H               | 3            | 30713619   |
|                  | F_3484996Y34    | P           | L               | 5            | 138715502  |
|                  | F_15833122Y14   | P           | L               | 7            | 96339061   |
|                  | F_1984806Y25    | P           | L               | 7            | 96339061   |
|                  | F_7100021Y24    | P           | L               | 7            | 96339061   |
|                  | A_16504321Y1    | P           | H               | 10           | 43601830   |
|                  | F_3490782Y30    | P           | L               | 12           | 1023218    |
|                  | F_5705877Y19    | P           | L               | 12           | 1023218    |
|                  | F_7100021Y24    | P           | L               | 12           | 1023218    |
|                  | F_7100021Y24    | P           | H               | 1            | 45297968   |
| 36 current cases | F_11345654Y23   | P           | L               | 1            | 226550829  |
|                  | F_7530369Y11    | P           | L               | 1            | 226550829  |
|                  | F_11345654Y23   | LP          | H               | 3            | 9792813    |
|                  | F_15206685Y5    | P           | H               | 3            | 9793529    |
|                  | F_15833122Y14   | P           | L               | 7            | 2289586    |
|                  | F_8412667Y10    | P           | H               | 14           | 36986635   |
|                  | A_1241          | P           | H               | 14           | 36986635   |
|                  | F_6631727Y27    | P           | H               | 2            | 48033981   |
|                  | F_900419Y7      | P           | H               | 2            | 48033981   |
|                  | F_1951831Y15    | P           | L               | 3            | 196735687  |
|                  | F_3044820Y29    | P           | L               | 3            | 196735687  |
|                  | F_10166792Y6    | P           | H               | 16           | 89986025   |
|                  | F_15703811Y21   | P           | H               | 16           | 89986025   |

|              |    |   |    |           |
|--------------|----|---|----|-----------|
| F_510575Y31  | P  | H | 16 | 89986025  |
| F_5705877Y19 | P  | H | 16 | 89986025  |
| F_7017924Y33 | P  | H | 16 | 89986025  |
| F_7100021Y24 | P  | H | 16 | 89986025  |
| F_9985603Y18 | P  | H | 16 | 89986025  |
| F_9784679Y16 | P  | H | 10 | 89621800  |
| F_9784679Y16 | P  | M | 10 | 89621853  |
| F_9784679Y16 | P  | H | 10 | 89621863  |
| F_5869863Y8  | P  | H | 5  | 156675967 |
| F_7530369Y11 | P  | M | 14 | 62207575  |
| F_8412667Y10 | P  | H | 9  | 101594229 |
| F_2304860Y4  | LP | H | 12 | 58145017  |
| F_15206685Y5 | P  | H | 15 | 40494810  |
| F_3490782Y30 | LP | H | 13 | 32929396  |
| F_7100021Y24 | LP | H | 13 | 32936738  |
| F_8412667Y10 | LP | H | 13 | 32914707  |
| F_1984806Y25 | P  | H | 9  | 34622032  |
| F_7530369Y11 | P  | M | 5  | 1293863   |
| F_900419Y7   | P  | M | 5  | 1293863   |
| WGC046639D   | P  | H | 20 | 31889141  |
| WGC046640D   | LP | H | 5  | 112102960 |
| WGC046587D   | P  | H | 15 | 40494810  |
| WGC046640D   | P  | H | 16 | 89986025  |
| WGC046613D   | P  | H | 1  | 45797760  |
| WGC046642D   | LP | L | 7  | 6017269   |
| WGC046640D   | P  | L | 12 | 1023218   |
| WGC046640D   | LP | H | 8  | 53543090  |
| WGC046597D   | LP | H | 1  | 161332308 |
| WGC046640D   | LP | H | 1  | 161332308 |
| WGC046578D   | P  | H | 3  | 30713619  |
| WGC046639D   | P  | M | 12 | 6711144   |
| WGC046630D   | P  | L | 7  | 2289586   |
| WGC046639D   | P  | L | 7  | 2289586   |
| WGC046578D   | P  | L | 1  | 226550829 |
| WGC046597D   | P  | L | 1  | 226550829 |
| WGC046630D   | P  | L | 1  | 226550829 |
| WGC046642D   | LP | H | 14 | 68331859  |
| WGC046642D   | P  | L | 5  | 138715502 |
| WGC046639D   | LP | H | 10 | 89621806  |
| P0000237852N | P  | H | 2  | 47657059  |
| P0004890433N | P  | H | 2  | 48033981  |
| P0011305141N | P  | H | 2  | 48033981  |
| P0015905855N | P  | H | 2  | 48033981  |
| P257468N     | P  | L | 7  | 2289586   |
| P0011305141N | P  | M | 5  | 1293863   |

additional 10  
cases (young  
never-smokers)

|                   |              |    |   |    |           |
|-------------------|--------------|----|---|----|-----------|
|                   | P0011305141N | P  | H | 16 | 89986025  |
|                   | P0015905855N | P  | H | 6  | 161771157 |
|                   | N18011768    | P  | L | 6  | 30627867  |
|                   | N17857998    | P  | H | 2  | 48033981  |
| additional 18     | N17911541    | P  | L | 1  | 226550829 |
| cases (old never- | N17911541    | P  | H | 16 | 89986025  |
| smokers)          | N17911541    | P  | H | 2  | 48033981  |
|                   | N18011768    | P  | M | 14 | 62207575  |
|                   | N18011768    | P  | H | 16 | 89986025  |
|                   | WGC046609D   | P  | H | 15 | 40494810  |
|                   | WGC046609D   | LP | H | 5  | 112824111 |
|                   | WGC046626D   | P  | L | 3  | 196735687 |
|                   | WGC046594D   | P  | H | 2  | 48033981  |
|                   | WGC046609D   | P  | M | 1  | 186643541 |
|                   | WGC046580D   | LP | H | 1  | 161332308 |
|                   | WGC046619D   | LP | H | 1  | 161332308 |
|                   | WGC046580D   | LP | L | 16 | 2137908   |

| <b>ID</b>   | <b>REF</b> | <b>ALT</b> | <b>GeneName</b> | <b>Func</b> |
|-------------|------------|------------|-----------------|-------------|
| rs17880039  | A          | G          | RAD9A           | exonic      |
| rs17880039  | A          | G          | RAD9A           | exonic      |
| rs6183      | C          | A          | GHR             | exonic      |
| rs6183      | C          | A          | GHR             | exonic      |
| rs6183      | C          | A          | GHR             | exonic      |
| rs6183      | C          | A          | GHR             | exonic      |
| .           | G          | A          | ERBB2           | splicing    |
| rs6141383   | G          | A          | BPIFB1          | exonic      |
| rs6141383   | G          | A          | BPIFB1          | exonic      |
| rs6141383   | G          | A          | BPIFB1          | exonic      |
| rs6141383   | G          | A          | BPIFB1          | exonic      |
| rs2232641   | T          | C          | LIG4            | exonic      |
| rs2232641   | T          | C          | LIG4            | exonic      |
| rs121912664 | C          | T          | TP53            | exonic      |
| rs74790047  | A          | C          | CHD4            | exonic      |
| rs74790047  | A          | C          | CHD4            | exonic      |
| rs74790047  | A          | C          | CHD4            | exonic      |
| rs74790047  | A          | C          | CHD4            | exonic      |
| rs189506473 | G          | A          | TSHR            | exonic      |
| rs200138601 | T          | C          | TSHR            | exonic      |
| rs34833812  | C          | T          | TGFBR2          | exonic      |
| rs33972313  | C          | T          | SLC23A1         | exonic      |
| rs4733      | C          | T          | SHFM1           | exonic      |
| rs4733      | C          | T          | SHFM1           | exonic      |
| rs4733      | C          | T          | SHFM1           | exonic      |
| rs34682185  | G          | A          | RET             | exonic      |
| rs4987207   | G          | T          | RAD52           | exonic      |
| rs4987207   | G          | T          | RAD52           | exonic      |
| rs4987207   | G          | T          | RAD52           | exonic      |
| rs80168454  | A          | G          | PTCH2           | exonic      |
| rs3219145   | T          | C          | PARP1           | exonic      |
| rs3219145   | T          | C          | PARP1           | exonic      |
| .           | C          | T          | OGG1            | exonic      |
| rs56053615  | G          | A          | OGG1            | exonic      |
| rs4866      | G          | A          | NUDT1           | exonic      |
| rs200560568 | C          | T          | NKX2-1          | exonic      |
| rs200560568 | C          | T          | NKX2-1          | exonic      |
| rs267608142 | T          | TTTGA      | MSH6            | exonic      |
| rs267608142 | T          | TTTGA      | MSH6            | exonic      |
| rs17129219  | C          | T          | MFI2            | exonic      |
| rs17129219  | C          | T          | MFI2            | exonic      |
| rs33932559  | T          | C          | MC1R            | exonic      |
| rs33932559  | T          | C          | MC1R            | exonic      |

|             |    |       |         |          |
|-------------|----|-------|---------|----------|
| rs33932559  | T  | C     | MC1R    | exonic   |
| rs33932559  | T  | C     | MC1R    | exonic   |
| rs33932559  | T  | C     | MC1R    | exonic   |
| rs33932559  | T  | C     | MC1R    | exonic   |
| rs33932559  | T  | C     | MC1R    | exonic   |
| rs144811392 | A  | T     | KLLN    | exonic   |
| rs147932146 | T  | C     | KLLN    | exonic   |
| rs201652303 | G  | C     | KLLN    | exonic   |
| rs34482255  | C  | T     | ITK     | exonic   |
| rs11549467  | G  | A     | HIF1A   | exonic   |
| rs145236923 | G  | A     | GALNT12 | exonic   |
| .           | T  | TG    | CDK4    | exonic   |
| rs28989187  | G  | A     | BUB1B   | exonic   |
| rs397507916 | C  | CT    | BRCA2   | exonic   |
| rs529779203 | A  | G     | BRCA2   | exonic   |
| rs80358862  | C  | T     | BRCA2   | exonic   |
| rs142710890 | C  | T     | ARID3C  | exonic   |
| rs144756946 | G  | A     | TERT    | exonic   |
| rs144756946 | G  | A     | TERT    | exonic   |
| rs6141383   | G  | A     | BPIFB1  | exonic   |
| rs139196838 | C  | T     | APC     | exonic   |
| rs28989187  | G  | A     | BUB1B   | exonic   |
| rs33932559  | T  | C     | MC1R    | exonic   |
| rs77542170  | T  | C     | MUTYH   | splicing |
| rs149202766 | G  | A     | PMS2    | exonic   |
| rs4987207   | G  | T     | RAD52   | exonic   |
| rs77998191  | T  | A     | RB1CC1  | splicing |
| .           | A  | C     | SDHC    | exonic   |
| .           | A  | C     | SDHC    | exonic   |
| rs34833812  | C  | T     | TGFBR2  | exonic   |
| rs74790047  | A  | C     | CHD4    | exonic   |
| rs4866      | G  | A     | NUDT1   | exonic   |
| rs4866      | G  | A     | NUDT1   | exonic   |
| rs3219145   | T  | C     | PARP1   | exonic   |
| rs3219145   | T  | C     | PARP1   | exonic   |
| rs3219145   | T  | C     | PARP1   | exonic   |
| rs753393344 | A  | G     | RAD51B  | splicing |
| rs33972313  | C  | T     | SLC23A1 | exonic   |
| .           | CG | C     | KLLN    | exonic   |
| rs63750006  | C  | A     | MSH2    | exonic   |
| rs267608142 | T  | TTTGA | MSH6    | exonic   |
| rs267608142 | T  | TTTGA | MSH6    | exonic   |
| rs267608142 | T  | TTTGA | MSH6    | exonic   |
| rs4866      | G  | A     | NUDT1   | exonic   |
| rs144756946 | G  | A     | TERT    | exonic   |

|             |   |       |       |        |
|-------------|---|-------|-------|--------|
| rs33932559  | T | C     | MC1R  | exonic |
| rs182893847 | T | G     | PARK2 | exonic |
| rs9262138   | T | C     | DHX16 | exonic |
| rs267608142 | T | TTTGA | MSH6  | exonic |
| rs3219145   | T | C     | PARP1 | exonic |
| rs33932559  | T | C     | MC1R  | exonic |
| rs267608142 | T | TTTGA | MSH6  | exonic |
| rs11549467  | G | A     | HIF1A | exonic |
| rs33932559  | T | C     | MC1R  | exonic |
| rs28989187  | G | A     | BUB1B | exonic |
| .           | T | C     | MCC   | exonic |
| rs17129219  | C | T     | MFI2  | exonic |
| rs267608142 | T | TTTGA | MSH6  | exonic |
| rs3218625   | C | T     | PTGS2 | exonic |
| .           | A | C     | SDHC  | exonic |
| .           | A | C     | SDHC  | exonic |
| rs45467993  | C | T     | TSC2  | exonic |
